# Supplementary material
Source: publisher figshare collection journal article supplement (https://frontiersin.figshare.com/ndownloader/files/24256751)
Supplement: Supplementary file [file 24256751]

Figure S5. real time qPCR validation of RNA-seq data in DAP<sup>R</sup> vs DAP<sup>S</sup> *S.aureus* parents

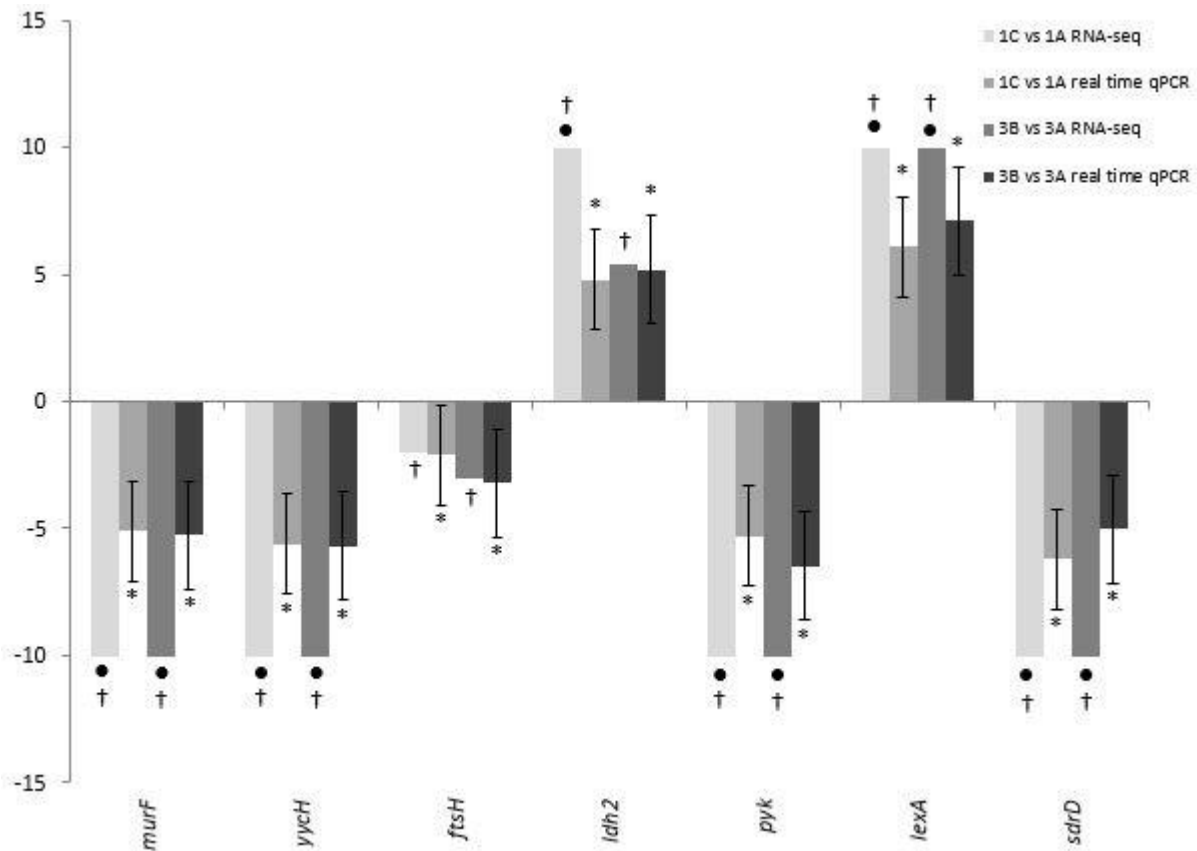

Legend:

- = a value of 10 Fold Changes (FC) (up-regulation) or -10 (down regulation) were indicated for incalculable FC due to the presence of a 0 value reads in one of the strains
- † = q-value  $\leq 0.01$  according to the Rockhopper guidelines.
- \* = p-value  $\leq 0.05$  Statistical expression analyses were performed using the relative expression software tool 2009 (REST2009).
